# Supplementary material for: Platelet activation and aggregation by the opportunistic pathogen Cutibacterium (Propionibacterium) acnes
Source: PLOS journal article supplement (doi:10.1371/journal.pone.0192051), 2018-01-31
Supplement: S4 (10.1371/journal.pone.0192051.s004) [file journal.pone.0192051.s004]

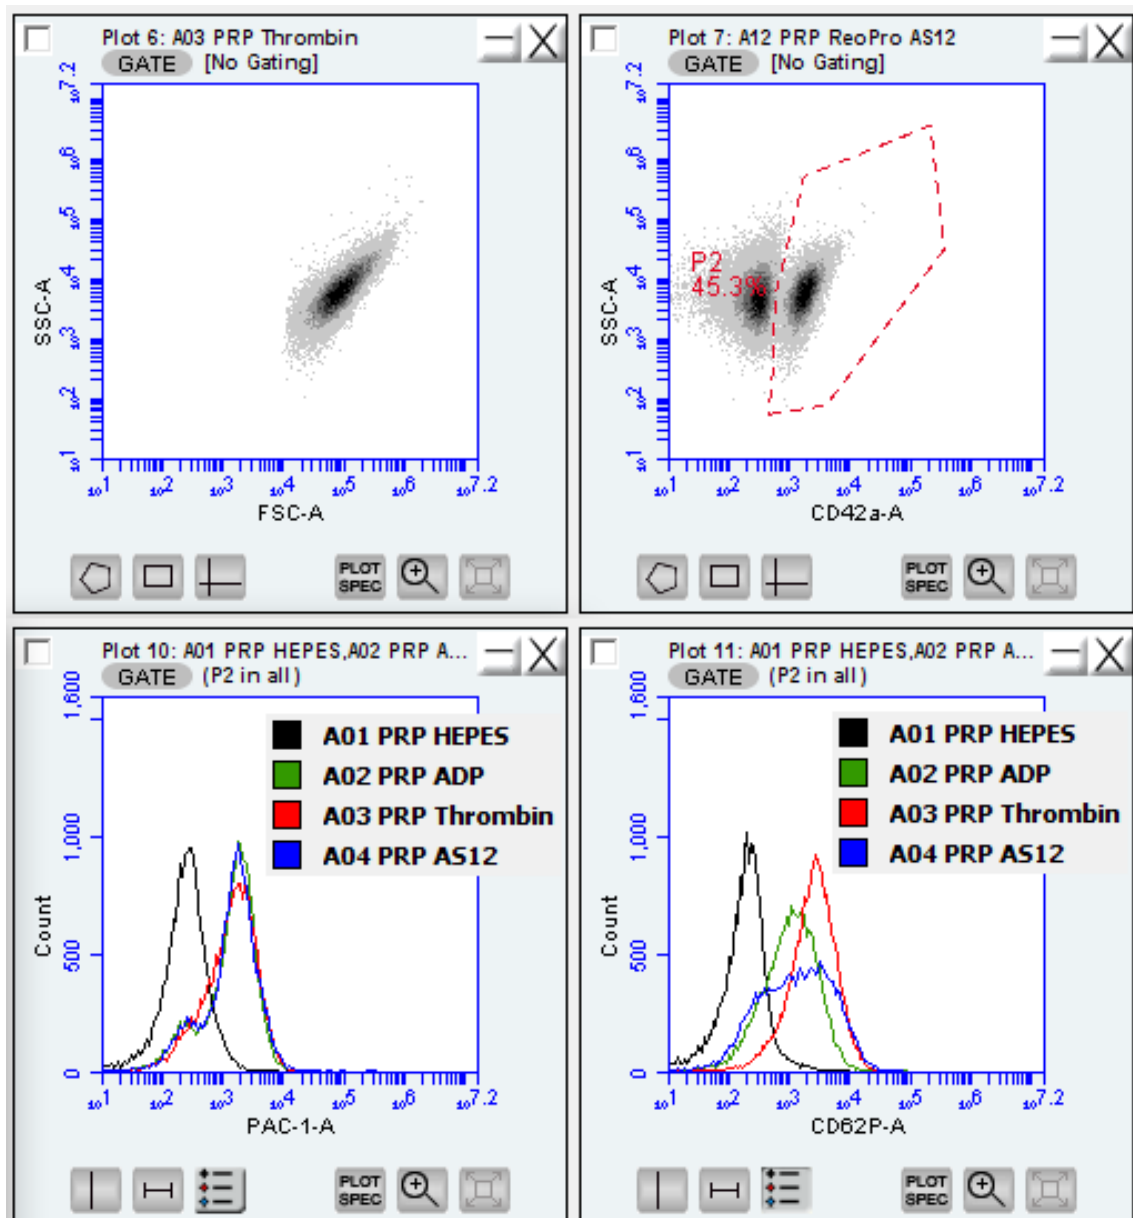

**S4 Fig. *C. acnes* mediated platelet activation detected using flow cytometry.** Representative figure demonstrating the gating of a platelet population in platelet-rich plasma and the detection of PAC-1 and CD62P on the surface of the platelets in that population.
